# Supplementary material for: Zika virus infection in human placental tissue explants is enhanced in the presence of dengue virus antibodies in-vitro
Source: PubMed Central journal article supplement (PMC6274641; doi:10.1038/s41426-018-0199-6), 2018-12-01

4 dpi

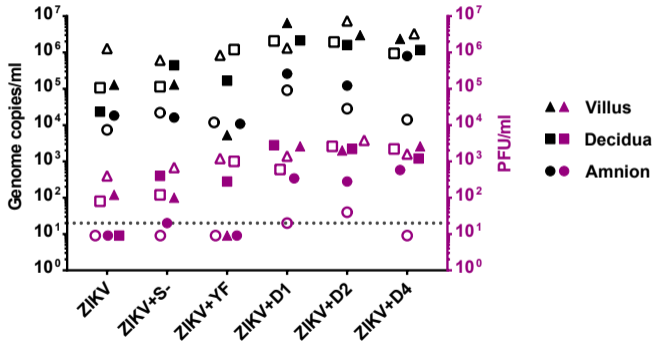

Supplement: 41426_2018_199_MOESM2_ESM.pdf [file 41426_2018_199_MOESM2_ESM.pdf]
